# Supplementary material
Source: PubMed Central journal article supplement (PMC2639325)
Supplement: djn385_1.pdf [file djn385_1.pdf]

Supplementary Figure 1

|            |      |                   |                   |                   |                   |                        |
|------------|------|-------------------|-------------------|-------------------|-------------------|------------------------|
|            | 601  | TTGTCTGTAA        | CGGATGCCG         | GGAGCAGACA        | AGCCCGTCAG        | GGCGGTCAG              |
|            | 651  | CGGGTGTGG         | CGGGTGTGG         | GGCTGGCTTA        | ACTATGCGGC        | ATCAGAGCAG             |
|            | 701  | ATTGTA            | GAGTGCACCA        | TATGCGGTGT        | GAAATACCGC        | ACAGATGCGT             |
|            | 751  | <u>AAGGAGAAAA</u> | <u>TACCGCATCA</u> | <u>GGCGCCATTC</u> | <u>GCCATTCAGG</u> | <u>CTGCGCAACT</u>      |
|            | 801  | <u>GTTGGGAAGG</u> | <u>GCGATCGGTG</u> | <u>CGGGCCTCTT</u> | <u>CGCTATTACG</u> | <u>CCAGCTGGCG</u>      |
|            | 851  | <u>AAAGGGGGAT</u> | <u>GTGCTGCAAG</u> | <u>GCGATTAAGT</u> | <u>TGGGTAACGC</u> | <u>CAGGGTTTTC</u>      |
| p2RT:      | 901  | <u>CCAGTCACGA</u> | <u>CGTTGTAAAA</u> | <u>CGACGGCCAG</u> | <u>TGAATT</u>     | <u>CGAG CTCGGTACCC</u> |
| p2RT-CG14: |      |                   |                   |                   |                   | <u>CCGC GCGCGCGCGC</u> |
| p2RT-MYC:  |      |                   |                   |                   |                   | <u>GCGG GGAGGGGCGC</u> |
| p2RT:      | 951  | <u>GGGGATCCTC</u> | <u>TAGAG</u>      | TCGAC             | CTGCAGGCAT        | GCAAGCTTGG             |
| p2RT-CG14: |      | <u>GCGCGCGCGC</u> | <u>GCGCG</u>      |                   |                   |                        |
| p2RT-MYC:  |      | <u>TTATGGGGAG</u> | <u>GGTTG</u>      |                   |                   |                        |
|            | 1001 | GTCATAGCTG        | TTTCCTGTGT        | GAAATTGTTA        | TCCGCTCACA        | ATTCCACACA             |
|            | 1051 | ACATACGAGC        | CGGAAGCATA        | AAGTGTAAG         | CCTGGGGTGC        | CTAATGAGTG             |
|            | 1101 | AGCTAACTCA        | CATTAATTGC        | GTTGCGCTCA        | CTGCCCGCTT        | TCCAGTCGGG             |
|            | 1151 | AAACCTGTCG        | TGCCAGCTGC        | ATTAATGAAT        | CGGCCAACGC        | GCGGGGAGAG             |
|            | 1201 | GCGGTTTTCG        | TATTGGGCGC        | TCTTCCGCTT        | CCTCGCTCAC        | TGACTCGCTG             |
|            | 1251 | CGCTCGGTCG        | TTCGGCTGCG        | GCGAGCGGTA        | TCAGCTCACT        | CAAAGGCGGT             |
|            | 1301 | AATACGGTTA        | TCCACAGAAT        | CAGGGGATAA        | CGCAGGAAAG        | AACATGTTGT             |
|            | 1351 | GACACGATGC        | AGCTTCAGGA        | TCGGATCCGG        | CTGTGGAATG        | TGTGTCAGTT             |
|            | 1401 | AGGGTGTGGA        | AAGTCCCCAG        | GCTCCCCAGC        | AGGCAGAAGT        | ATGCAAAGCA             |
|            | 1451 | TGCATCTCAA        | TTAGTCAGCA        | ACCAGGTGTG        | GAAAGTCCCC        | AGGCTCCCCA             |
|            | 1501 | GCAGGCAGAA        | GTATGCAAAG        | CATGCATCTC        | AATTAGTCAG        | CAACCATAGT             |
|            | 1551 | CCCGCCCTA         | ACTCCGCCCA        | TCCCGCCCCT        | AACTCCGCC         | AGTTCCGCC              |
|            | 1601 | <u>ATTCTCCGCC</u> | <u>CCATGGCTGA</u> | <u>CTAATTTTTT</u> | <u>TTATTTATGC</u> | <u>AGAGGCCGAG</u>      |
|            | 1651 | <u>GCCGCCTCGG</u> | <u>CCTCTGAGCT</u> | <u>ATTCCAGAAG</u> | <u>TAGTGAGGAG</u> | <u>GCTTTTTTGG</u>      |
|            | 1701 | <u>AGGCCTAGGC</u> | <u>TTTTGCAAAA</u> | <u>AGCTTCACGC</u> | <u>TGCCGCAAGC</u> | <u>ACTCAGGGCG</u>      |
