# Supplementary material
Source: PubMed Central journal article supplement (PMC2639325)
Supplement: djn385_2.pdf [file djn385_2.pdf]

### Supplementary Figure 1 Legend

Supplementary Figure 1. H-DNA- and Z-DNA-forming sequences in the p2RT plasmid.

The H-DNA- and Z-DNA-forming sequences and the control sequence of the wild-type plasmid are **highlighted in yellow**. The *LacZ'* gene coding region (754–930) and SV40 Replication Origin (1573–1724) are **underlined**.
