# Supplementary material
Source: PubMed Central journal article supplement (PMC2639325)
Supplement: djn385_3.pdf [file djn385_3.pdf]

**Supplementary Table 1. Primers used in this study**

| <b>Primer</b> | <b>Location (on p2RT)</b> | <b>Sequence (5' to 3')</b> |
|---------------|---------------------------|----------------------------|
| AmpF          | 6202–6221                 | GCTGAAGCCAGTTACCTTCG       |
| AmpR          | 6570–6551                 | GGGAGTCAGGCAACTATGGA       |
| NonBF         | 867–886                   | CAAGGCGATTAAGTTGGGTA       |
| NonBR         | 1053–1034                 | TGTTGTGTGGAATTGTGAGC       |
| NeoF          | 3985–4004                 | TGCTCCTGCCGAGAAAGTAT       |
| NeoR          | 4348–4329                 | AATATCACGGGTAGCCAACG       |

\*Amp=ampicillin resistance; NonB=H-DNA, Z-DNA, or control sequence; Neo=neomycin resistance. F=forward; R=reverse.
